# Supplementary material
Source: PubMed Central journal article supplement (PMC6203440)
Supplement: NIHMS993120-supplement-Supplemental_tables.pdf [file NIHMS993120-supplement-Supplemental_tables.pdf]

## **SUPPLEMENTAL TABLES**

**Table A: Associations between Baseline Physical function and Changes in Actigraphy**

| <u>Change in Actigraphy Measure</u>        | <u>Spearman Correlation Coefficient</u> | <u>P-Value</u> |
|--------------------------------------------|-----------------------------------------|----------------|
| Daytime Activity (n=23)                    | -0.64                                   | 0.001          |
| Daytime Average Activity per Minute (n=23) | -0.70                                   | 0.0002         |
| Daytime Maximum Activity (n=23)            | -0.32                                   | 0.13           |
| Variability in Activity (n=23)             | -0.68                                   | 0.0003         |
| Immobile Time (n=23)                       | 0.29                                    | 0.18           |
| Total Sleep Time (n=23)                    | 0.37                                    | 0.08           |
| Wake After Sleep Onset (n=22)              | -0.13                                   | 0.57           |
| Sleep Efficiency (n=22)                    | 0.11                                    | 0.63           |
| Total Activity at Night (n=22)             | -0.21                                   | 0.35           |

**Table B: Associations between Baseline Patient Characteristics and Changes in Actigraphy.** BMI: body mass index

| <b>Baseline Covariate</b> | <b>Change in Actigraphy Measure</b> | <b>Spearman Correlation Coefficient</b> | <b>P-Value</b> |
|---------------------------|-------------------------------------|-----------------------------------------|----------------|
| Age (n=23)                | Daytime Activity                    | 0.36                                    | 0.09           |
| Age (n=23)                | Daytime Average Activity per Minute | 0.41                                    | 0.052          |
| Age (n=23)                | Daytime Maximum Activity            | 0.05                                    | 0.82           |
| Age (n=23)                | Variability in Activity             | 0.24                                    | 0.27           |
| Age (n=23)                | Immobile Time                       | -0.34                                   | 0.11           |
| Age (n=23)                | Total Sleep Time                    | -0.43                                   | 0.039          |
| Age (n=23)                | Wake After Sleep Onset              | -0.23                                   | 0.30           |
| Age (n=23)                | Sleep Efficiency                    | 0.10                                    | 0.64           |
| Age (n=23)                | Total Activity at Night             | -0.11                                   | 0.61           |
| BMI (n=24)                | Daytime Activity                    | 0.48                                    | 0.017          |
| BMI (n=24)                | Daytime Average Activity per Minute | 0.48                                    | 0.019          |
| BMI (n=24)                | Daytime Maximum Activity            | -0.05                                   | 0.82           |
| BMI (n=24)                | Variability in Activity             | 0.49                                    | 0.016          |
| BMI (n=24)                | Immobile Time                       | -0.20                                   | 0.36           |
| BMI (n=24)                | Total Sleep Time                    | -0.22                                   | 0.31           |
| BMI (n=23)                | Wake After Sleep Onset              | 0.12                                    | 0.59           |
| BMI (n=23)                | Sleep Efficiency                    | -0.22                                   | 0.32           |
| BMI (n=23)                | Total Activity at Night             | 0.08                                    | 0.72           |

**Table C: Association of Prior Chemotherapy and Changes in Actigraphy or Patient-reported Symptoms.** PSQI: Pittsburgh Sleep Quality Index, FACT-ES: Functional Assessment of Cancer Therapy-Endocrine Subscale, BPI: Brief Pain Inventory

| <b>Variable</b>                         | <b>Odds Ratio (OR)</b> | <b>OR 95% CI</b> | <b>P-Value</b> |
|-----------------------------------------|------------------------|------------------|----------------|
| Daytime Activity (n=24)                 | 1.00                   | (1.00, 1.00)     | 0.69           |
| Daytime Avg. Activity per Minute (n=24) | 1.00                   | (0.98, 1.02)     | 0.79           |
| Daytime Maximum Activity (n=24)         | 0.99                   | (0.99, 1.00)     | 0.06           |
| Variability in Activity (n=24)          | 0.99                   | (0.95, 1.03)     | 0.59           |
| Immobile Time (n=24)                    | 0.99                   | (0.98, 1.01)     | 0.41           |
| Total Sleep Time (n=24)                 | 0.99                   | (0.98, 1.01)     | 0.41           |
| Wake After Sleep Onset (n=25)           | 0.98                   | (0.95, 1.01)     | 0.23           |
| Sleep Efficiency (n=25)                 | 1.03                   | (0.89, 1.20)     | 0.68           |
| Total Activity at Night (n=25)          | 1.00                   | (1.00, 1.00)     | 0.09           |
| Sleep Time during Night Hours (n=25)    | 0.98                   | (0.95, 1.02)     | 0.37           |
| Physical Function (n=29)                | 1.05                   | (0.91, 1.21)     | 0.52           |
| Fatigue (n=30)                          | 0.91                   | (0.80, 1.03)     | 0.13           |
| FACT-ES (n=31)                          | 1.05                   | (0.97, 1.14)     | 0.21           |
| BPI Severity (n=29)                     | 1.62                   | (0.74, 3.55)     | 0.22           |
| BPI Interference (n=28)                 | 1.03                   | (0.62, 1.72)     | 0.91           |
| PSQI (n=29)                             | 1.06                   | (0.79, 1.41)     | 0.70           |
| Sleep Disturbance (n=30)                | 1.00                   | (0.89, 1.12)     | 0.96           |

**Table D: Associations between Baseline Patient Characteristics and Changes in Patient-reported Symptoms.** PSQI: Pittsburgh Sleep Quality Index, PROMIS: Patient-Reported Outcomes Measurement Information System, FACT-ES: Functional Assessment of Cancer Therapy-Endocrine Subscale, BPI: Brief Pain Inventory

| <b>Baseline Covariate</b> | <b>Change in Patient-reported Symptom</b> | <b>Spearman Correlation Coefficient</b> | <b>P-Value</b> |
|---------------------------|-------------------------------------------|-----------------------------------------|----------------|
| Age (n=28)                | PROMIS Physical Function                  | -0.04                                   | 0.86           |
| Age (n=29)                | PROMIS Fatigue                            | -0.17                                   | 0.38           |
| Age (n=30)                | FACT-ES                                   | 0.19                                    | 0.30           |
| Age (n=28)                | BPI Severity                              | -0.03                                   | 0.90           |
| Age (n=27)                | BPI Interference                          | -0.40                                   | 0.039          |
| Age (n=28)                | PSQI                                      | -0.43                                   | 0.039          |
| Age (n=29)                | PROMIS Sleep Disturbance                  | 0.04                                    | 0.82           |
| BMI (n=29)                | PROMIS Physical Function                  | 0.18                                    | 0.34           |
| BMI (n=30)                | PROMIS Fatigue                            | -0.20                                   | 0.30           |
| BMI (n=31)                | FACT-ES                                   | 0.32                                    | 0.08           |
| BMI (n=29)                | BPI Severity                              | 0.18                                    | 0.36           |
| BMI (n=28)                | BPI Interference                          | -0.01                                   | 0.95           |
| BMI (n=29)                | PSQI                                      | 0.09                                    | 0.65           |
| BMI (n=30)                | PROMIS Sleep Disturbance                  | -0.11                                   | 0.58           |
